# Supplementary material
Source: publisher figshare collection journal article supplement (https://acs.figshare.com/ndownloader/files/18519824)
Supplement: Supplementary file 1 [file 18519824]

## Supporting information

### **Evaluation of the Performance and Hematocrit Independence of the HemaPEN as a Volumetric Dried Blood Spot Collection Device**

Sigrid Deprez<sup>1</sup>; Lucía Paniagua-González<sup>2</sup>; Sofie Velghe<sup>1</sup>; Christophe P Stove<sup>1,\*</sup>

<sup>1</sup>Laboratory of Toxicology, Department of Bioanalysis, Faculty of Pharmaceutical Sciences, Ghent University, Ottergemsesteenweg 460, 9000 Ghent, Belgium

<sup>2</sup>Toxicology Service, Institute of Forensic Sciences, Faculty of Medicine, University of Santiago de Compostela, Rúa San Francisco s/n, 15782 Santiago de Compostela, Spain

#### **CONTENT**

|                 |                                                                                                                                                                                            |
|-----------------|--------------------------------------------------------------------------------------------------------------------------------------------------------------------------------------------|
| <b>Page S-2</b> | <b>Supplementary Data Table S-1<br/>Results analyte and IS-compensated matrix effect.</b>                                                                                                  |
| <b>Page S-2</b> | <b>Supplementary Data Table S-2<br/>Results stability study hemaPEN®.</b>                                                                                                                  |
| <b>Page S-3</b> | <b>Supplementary Data Figure S-1<br/>Bland-Altman comparison for whole liquid blood to<br/>3 mm partial-punch DBS</b>                                                                      |
| <b>Page S-4</b> | <b>Supplementary Data Figure S-2<br/>Regression analyses of the individual hemaPEN®-<br/>whole blood differences as a function of hct.</b>                                                 |
| <b>Page S-5</b> | <b>Supplementary Data Figure S-3a and S-3b<br/>Box-and-Whisker plots evaluation of hemaPEN®<br/>robustness to sample volume, device lot, analytical<br/>operator and sample stability.</b> |

## Supplementary data Table S-1

### Results analyte and IS-compensated matrix effect

Table S-1. Analyte and IS-compensated matrix effect for caffeine and paraxanthine at two different concentration levels (n= 9).

|                              | Caffeine |         | Paraxanthine |         |
|------------------------------|----------|---------|--------------|---------|
|                              | Low QC   | High QC | Low QC       | High QC |
| Analyte matrix effect        |          |         |              |         |
| Mean of 9 donors (%)         |          | 97%     | 94%          | 105%    |
| (%CV)                        |          | 6.95%   | 3.62%        | 5.15%   |
| IS compensated matrix effect |          |         |              |         |
| Mean of 9 donors (%)         |          | 104%    | 99%          | 101%    |
| (%CV)                        |          | 4.78%   | 4.24%        | 4.96%   |

## Supplementary data Table S-2

### Results stability study hemaPEN®

Table S-2. Stability data for caffeine and paraxanthine in hemaPEN® after storage for 4 days at 60°C and 2 months at room temperature, kept in their original package. Expressed in % difference with the nominal value.

| QC      | 4 days at 60°C (% difference) (n = 3) |              |                       | 2 months at T <sub>r</sub> (% difference) (n =3) |              |
|---------|---------------------------------------|--------------|-----------------------|--------------------------------------------------|--------------|
|         | Caffeine                              | Paraxanthine | Concentration (µg/mL) | Caffeine                                         | Paraxanthine |
| Low QC  | -0.56%                                | 2.50%        | 0.12 or 0.06          | -3.33%                                           | -10.22%      |
| High QC | -1.92%                                | 0.92%        | 8.0 or 4.0            | -11.18%                                          | -8.08%       |

# Supplementary data Figure S-1

## Bland-Altman comparison for whole liquid blood to 3 mm partial-punch DBS

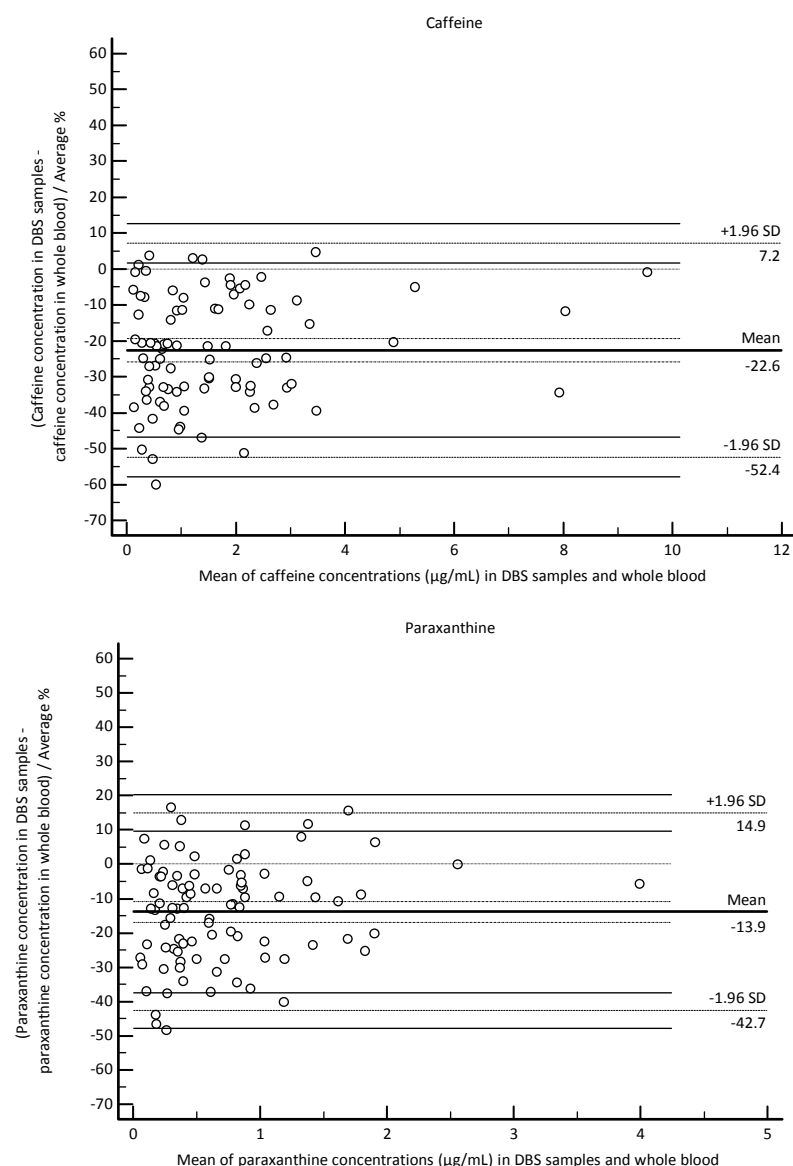

Figure S-1. Bland-Altman plots for the comparison between whole blood and 3 mm partial-punch DBS concentrations for caffeine (n=88) and paraxanthine (n=91). Mean differences and limits of agreement (LoA) are represented by full lines, 95% confidence limits by broken lines.

## Supplementary data Figure S-2

### Regression analyses of the individual hemaPEN®-whole blood differences as a function of hct.

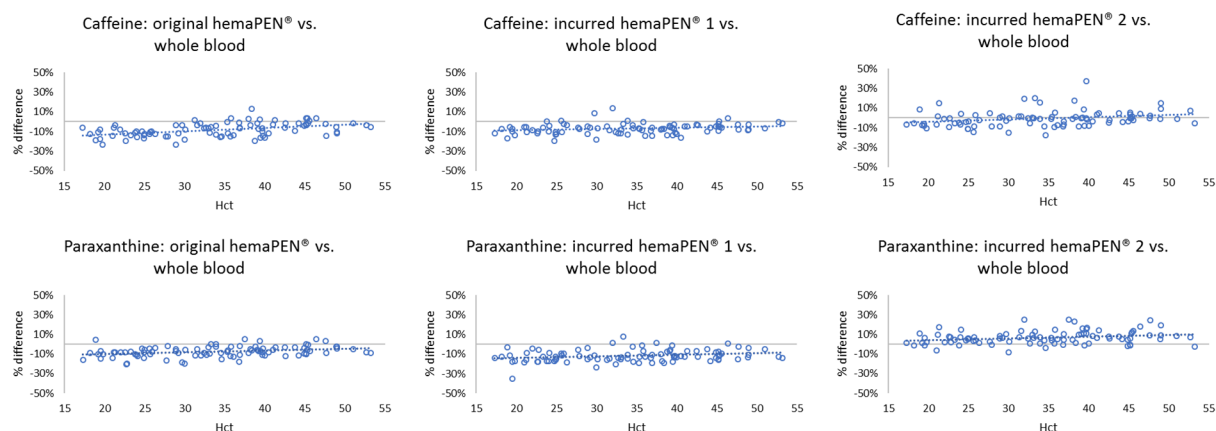

Figure S-2. % difference between hemaPEN® DBS and whole blood concentrations, plotted against hct for caffeine and paraxanthine. Broken lines represent linear regression lines. The respective slopes for original hemaPEN® DBS, incurred hemaPEN® DBS 1 and incurred hemaPEN® DBS 2 were 0.003388 (95%CI [0.00198;0.00480]), 0.001301 (95%CI [0.00012;0.00248]) and 0.002309 (95%CI [0.00045;0.00417]) for caffeine and 0.001898 (95%CI [0.000768;0.003028]), 0.001587 (95%CI [0.000238;0.002935]) and 0.001769 (95%CI [0.00032;0.003219]) for paraxanthine. The respective intercepts for original hemaPEN® DBS, incurred hemaPEN® DBS 1 and incurred hemaPEN® DBS 2 were -0.1966 (95%CI [-0.2466;-0.1466]), -0.1146 (95%CI [-0.1565;-0.0728]) and -0.0860 (95%CI [-0.1520;-0.0200]) for caffeine and -0.1408 (95%CI [-0.1809;-0.1008]), -0.1722 (95%CI [-0.2200;-0.1244 ]) and 0.00756 (95%CI [-0.0438;0.0590 ]) for paraxanthine.

### Supplementary data Figure S-3

**Box-and-Whisker plots evaluation hemaPEN® robustness to sample volume, device lot, analytical operator and sample stability.**

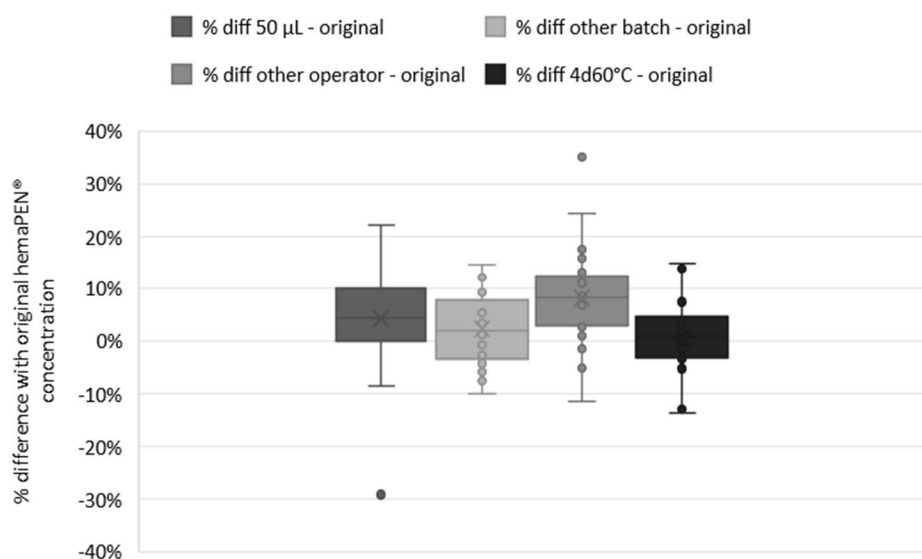

Figure S-3A. 50 µL, other batch, other operator and the set kept for 4 days at 60°C compared to the original hemaPEN® measurement for caffeine in % difference. Based on a box-and-whisker plot two outliers can be identified.

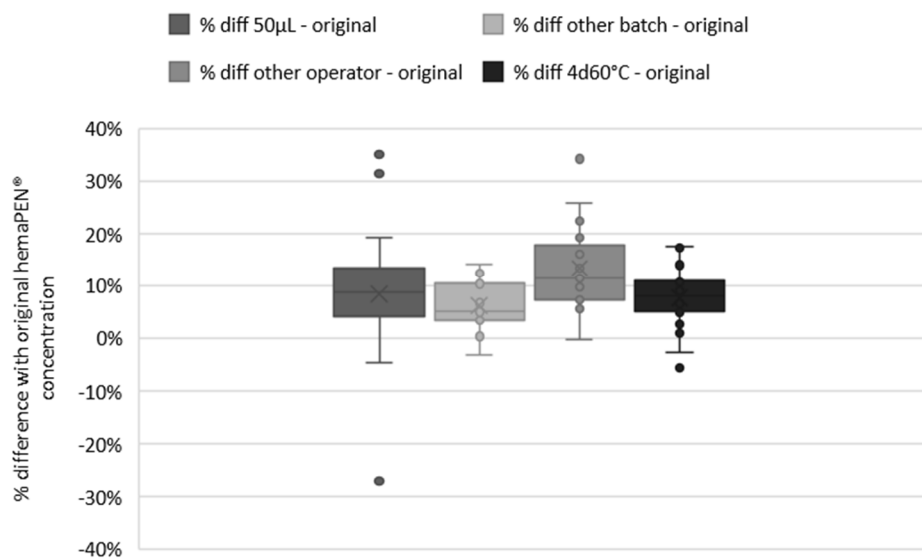

Figure S-3B. 50 µL, other batch, operator and the set kept for 4 days at 60°C compared to the original hemaPEN® measurement for paraxanthine in % difference. Based on a box-and-whisker plot five outliers can be identified.
